# Supplementary material for: Hereditary hemorrhagic telangiectasia: diagnosis and management from the hematologist’s perspective
Source: PubMed Central journal article supplement — Haematologica. 2018 May 24;103(9):1433–43. doi: 10.3324/haematol.2018.193003 (PMC6119150; doi:10.3324/haematol.2018.193003), 2018-09
Supplement: 2018.193003.KRITHARIS_SUPPL.pdf [file 2018.193003.KRITHARIS_SUPPL.pdf]

# Hereditary hemorrhagic telangiectasia: diagnosis and management from the hematologist's perspective

Athena Kritharis,<sup>1</sup> Hanny Al-Samkari<sup>2</sup> and David J Kuter<sup>2</sup>

<sup>1</sup>Division of Blood Disorders, Rutgers Cancer Institute of New Jersey, New Brunswick, NJ and <sup>2</sup>Hematology Division, Massachusetts General Hospital, Harvard Medical School, Boston, MA, USA

©2018 Ferrata Storti Foundation. This is an open-access paper. doi:10.3324/haematol.2018.193003

Received: April 4, 2018.

Accepted: May 14, 2018.

Pre-published: May 24, 2018.

Correspondence: hal-samkari@mgh.harvard.edu

---

**Supplemental Table.** Active and recruiting clinical trials in hereditary hemorrhagic telangiectasia.

| <b>Trial Number<br/>(clinicaltrials.gov)</b> | <b>Locations</b> | <b>Trial Name</b>                                                                                                             |
|----------------------------------------------|------------------|-------------------------------------------------------------------------------------------------------------------------------|
| NCT01402531                                  | U.S.             | Submucosal Bevacizumab for the Management of Recurrent Epistaxis in Patients With Hereditary Hemorrhagic Telangiectasia (HHT) |
| NCT03227263                                  | France           | BABH Study: Efficacy and Safety of Bevacizumab on Severe Bleedings Associated With Hemorrhagic Hereditary Telangiectasia      |
| NCT01397695                                  | U.S.             | Topical Bevacizumab for the Management of Recurrent Epistaxis in Patients With Hereditary Hemorrhagic Telangiectasia (HHT)    |
| NCT01752049                                  | Canada<br>U.S.   | Topical Anti-angiogenic Therapy for Telangiectasia in HHT: Proof of Concept                                                   |
| NCT01406639                                  | U.S.             | Ranibizumab for the Management of Recurrent Nosebleeds in Patients with Hereditary Hemorrhagic Telangiectasia                 |
| NCT02638012                                  | Canada           | Prospective Pilot Study of Floseal for the Treatment of Anterior Epistaxis in Patients With HHT                               |
| NCT02874326                                  | Netherlands      | Octreotide in Patients With GI Bleeding Due to Rendu-Osler-Weber (ROW)                                                        |
| NCT02389959                                  | U.S.             | Intranasal Bevacizumab for HHT-Related Epistaxis                                                                              |
| NCT02204371                                  | U.S.<br>Canada   | Evaluation of Pazopanib on Bleeding in Subjects with Hereditary Hemorrhagic Telangiectasia                                    |
