# Supplementary material for: Hereditary hemorrhagic telangiectasia: diagnosis and management from the hematologist’s perspective
Source: PubMed Central journal article supplement — Haematologica. 2018 May 24;103(9):1433–43. doi: 10.3324/haematol.2018.193003 (PMC6119150; doi:10.3324/haematol.2018.193003), 2018-09
Supplement: 2018_193003-Disclosures_and_Contributions.pdf [file 2018_193003-Disclosures_and_Contributions.pdf]

Haematologica  
HAEMATOL/2018/193003  
Version 2

Hereditary hemorrhagic telangiectasia: diagnosis and management  
from the hematologist's perspective

Athena Kritharis, Hanny Al-Samkari, and David J Kuter

Disclosures: Kritharis: There are no relationships to disclose. Al-Samkari: Consultancy (Agiros). Kuter: Research funding (Protalex, Bristol-Myers Squibb, Rigel); Consultancy (ONO, Pfizer, 3SBios, Eisai, GlaxoSmithKline, Genzyme, Shire, Amgen, Shionogi, Rigel, Syntimmune, MedImmune); Paid expert testimony (Amgen, CRICO).

Contributions: A. Kritharis wrote and revised the review and created tables and figures; H. Al-Samkari wrote and revised the review and created tables and figures; D. Kuter critically revised and supervised the review.
