# Supplementary material for: Hereditary hemorrhagic telangiectasia: diagnosis and management from the hematologist’s perspective
Source: PubMed Central journal article supplement — Haematologica. 2018 May 24;103(9):1433–43. doi: 10.3324/haematol.2018.193003 (PMC6119150; doi:10.3324/haematol.2018.193003), 2018-09
Supplement: HAEMATOL-2018-193003v2-Kritharis_v2-01.pdf [file HAEMATOL-2018-193003v2-Kritharis_v2-01.pdf]

# Pathophysiology, diagnosis and management of hereditary hemorrhagic telangiectasia (HHT)

## Physiological signaling pathway

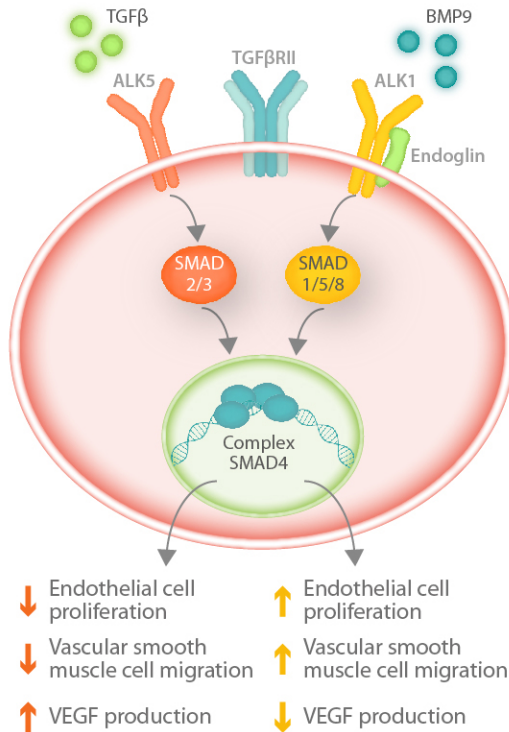

## Pathophysiological signaling pathway in HHT

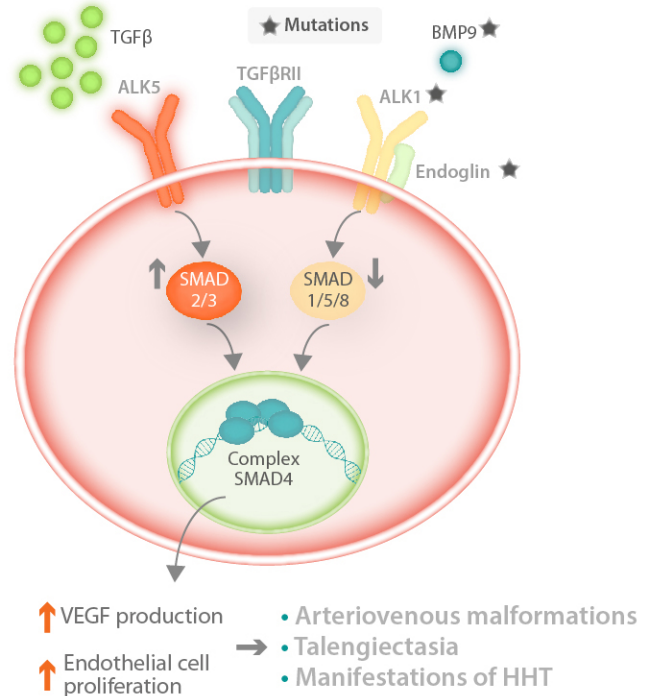

## CLINICAL MANIFESTATIONS

- Mucocutaneous telangiectasias
- Arteriovenous malformations
- Epistaxis
- GI bleeding
- Iron deficiency
- Iron deficiency anemia
- Ischemic and hemorrhagic stroke
- Brain abscess
- Heart failure
- Liver failure

## DIAGNOSTIC CRITERIA (Curaçao criteria)

- Spontaneous and recurrent epistaxis
- Telangiectasias at characteristic sites
- Visceral arteriovenous malformations or telangiectasias
- A first degree relative with HHT
